# Supplementary material for: Glutathione-S-transferase-catalyzed reaction of glutathione for electrochemical biosensing of temephos, fenobucarb and dimethoate
Source: Royal Society of Chemistry journal article supplement (doi:10.1039/c7ay01258f), 2017-01-01
Supplement: c7ay01258f1.pdf [file c7ay01258f1.pdf]

## Supporting Information

### Manuscript title

Glutathione-S-Transferase catalyzed reaction of glutathione for electrochemical biosensing of Temephos, Fenobucarb and Dimethoate

### Authors

Himadri Borah<sup>a</sup>, Rekha Rani Dutta<sup>a</sup>, Sudarsan Gogoi<sup>a</sup>, Tapas Medhi<sup>b</sup> and Panchanan Puzari<sup>a\*</sup>

<sup>a</sup>Department of Chemical Sciences, Tezpur University, Tezpur, Assam, India-784028

<sup>b</sup> Department of Molecular Biology and Biotechnology, Tezpur University, Tezpur, Assam, India-784028

### $K_m$ and $V_{max}$ for GSH-CDNB-GST (without inhibitor):

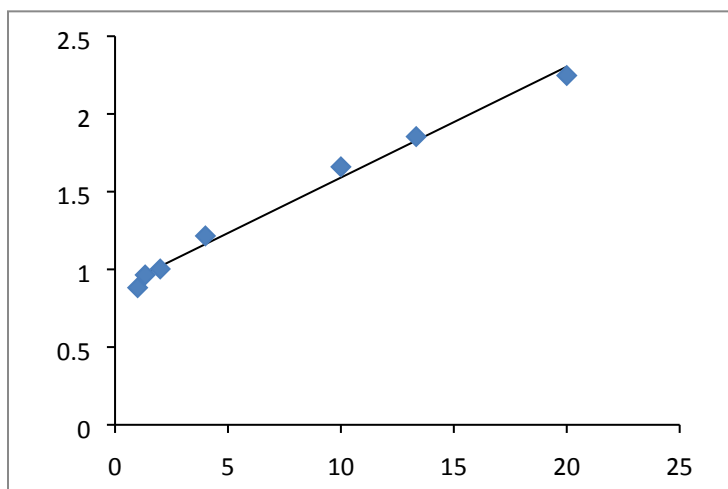

$$K_m = \text{slope}/\text{intercept} = 0.071/0.876 = 0.08$$

$$V_{max} = K_m/\text{slope} = 0.08/0.071 = 1.14$$

**K<sub>i</sub> calculation for Fenobucarb:**

$K_m$  60 ppb= 0.219/0.875 = 0.2502

$V_{max}$  = 0.2502/0.219 = 1.14

$K_m$  50 ppb= 0.135/0.872 = 0.1548

$V_{max}$  = 0.1548/0.135= 1.14

$K_m$  40ppb = 0.083/0.875= 0.0948

$V_{max}$  = 0.0948/0.083= 1.14

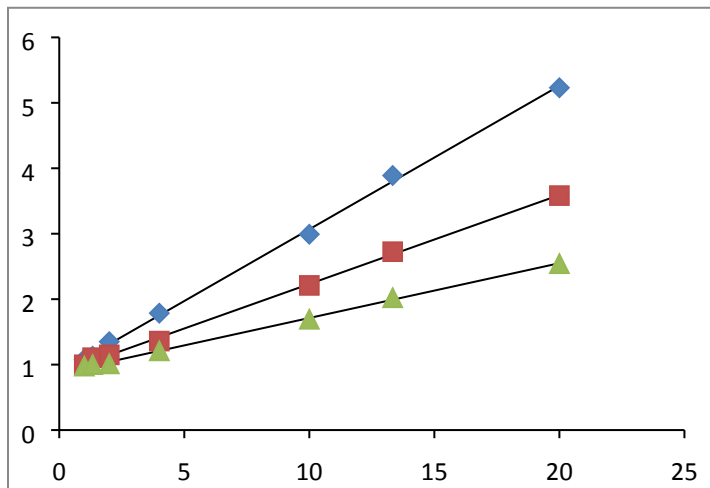

$K_m$  (inhibitor) /  $K_m$  (without inhibitor) vs [I] = Slope = 1/ $K_i$

$K_m$  (without inhibitor) = 0.08

$K_{60\text{ppb}}/K_m = 0.2502/0.08 = 3.12$

$K_{50\text{ppb}}/K_m = 0.1548/0.08 = 1.93$

$K_{40\text{ppb}}/K_m = 0.0948/ 0.08 = 1.18$

| Concentration of fenobucarb | $K_m$ value for each concentration |
|-----------------------------|------------------------------------|
| 60 ppb                      | 3.12                               |
| 50 ppb                      | 1.93                               |
| 40 ppb                      | 1.18                               |

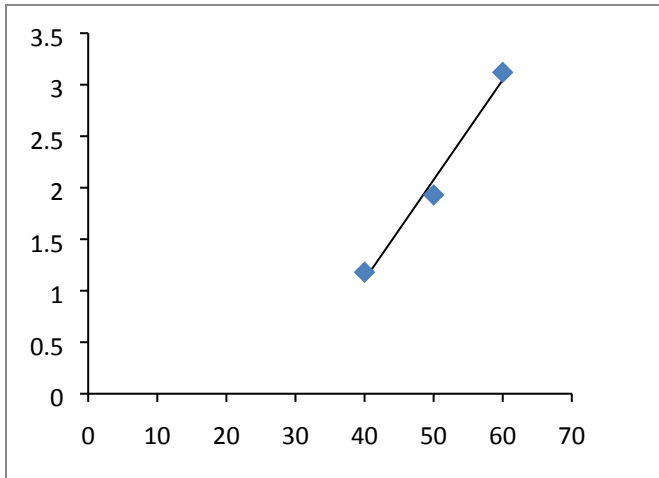

Slope =  $1/K_i = 0.097$

Therefore,  $K_i = 1/0.097 = 10.30$

**$K_i$  calculation for Temephos:**

$K_m$  60 ppb =  $0.104/1.278 = 0.0813$

$V_{max} = 0.0813/0.104 = 0.7817$

$K_m$  50ppb =  $0.090/1.094 = 0.0822$

$V_{max} = 0.0822/0.090 = 0.9133$

$K_m$  40 ppb =  $0.077/0.948 = 0.0812$

$V_{max} = 0.0812/0.077 = 1.054$

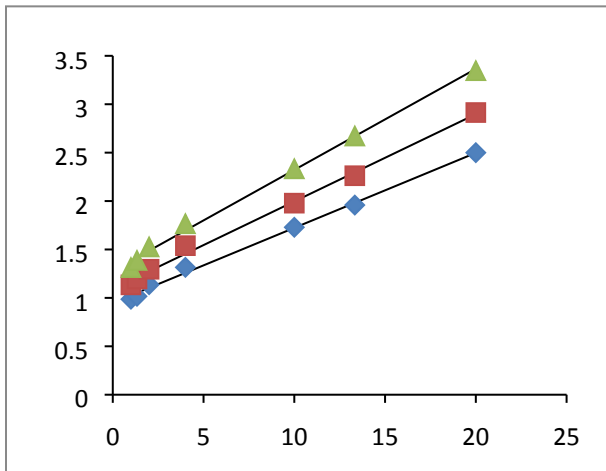

| Concentration of temephos | $1/V_{max}$ value for each concentration |
|---------------------------|------------------------------------------|
| 60 ppb                    | 1.279                                    |
| 50 ppb                    | 1.094                                    |
| 40 ppb                    | 0.948                                    |

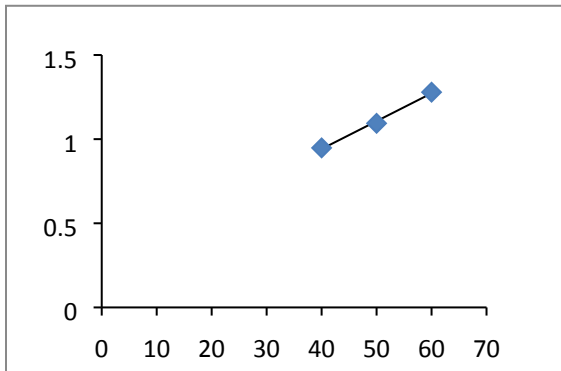

$$K_i = 1/(\text{slope} \times V_{\max}) = 1/(0.016 \times 1.14) = 54.82$$

[  $V_{\max}$  (without inhibitor) = 1.14 ]

**$K_i$  calculation for Dimethoate:**

$$K_m \text{ 60 ppb} = 0.139/0.231 = 0.6017$$

$$V_{\max} \text{ 60 ppb} = 0.6017/0.139 = 4.32$$

$$K_m \text{ 50 ppb} = 0.1/0.42 = 0.2380$$

$$V_{\max} \text{ 50 ppb} = 0.2380/0.1 = 2.38$$

$$K_m \text{ 40 ppb} = 0.071/0.564 = 0.1258$$

$$V_{\max} \text{ 40 ppb} = 0.1258/0.071 = 1.77$$

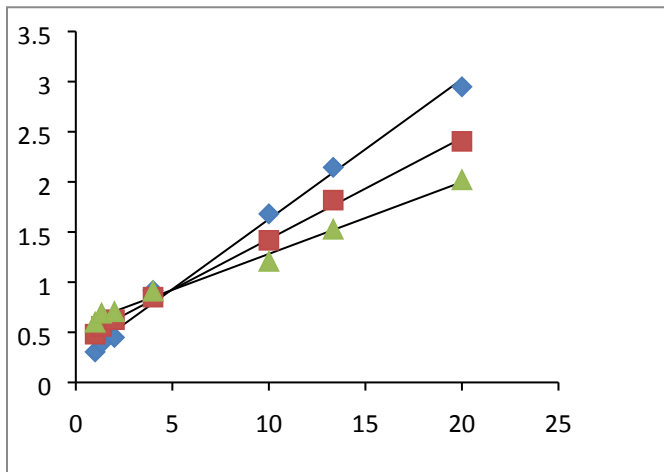

## Comparison of the method with other methods

Table S1 shows a comparison of our method with the other methods available in literature. The table reveals that the detection limits of all the four pesticides obtained by our method is within the range of those reported methods. It is evident from the table that for the two pesticides fenobucarb and temephos no reliable biosensing method other than our one available in literature. It is the most promising aspect of the present method.

Table T<sub>1</sub>: Comparison of the present method with other methods

| Sl. No. | Pesticide      | Method of detection                                     | Limit of detection | Linear range                 | Reference |
|---------|----------------|---------------------------------------------------------|--------------------|------------------------------|-----------|
| 1.      | Fenobucarb     | Flow Amperometry                                        | 2 ppb              | -                            | 54        |
| 2.      | -do-           | Liquid chromatography–<br>tandem mass spectrometry      | 1.5 ppb            | -                            | 55        |
| 3.      | -do-           | Gas chromatography/Mass spectrometry                    | 4 ppb              | -                            | 56        |
| 4.      | -do-           | GST biosensor                                           | 2 ppb              | 2-50 ppb                     | This work |
| 5.      | Temephos       | Liquid Chromatography/Diode Array                       | 9 ppb              | -                            | 57        |
| 6.      | -do-           | -do-                                                    | 0.02-0.2 ppb       | -                            | 58        |
| 7.      | -do-           | Liquid chromatography–ion trap-<br>mass spectrometry    |                    | -                            | 59        |
| 8.      | -do-           | Thermospray liquid chromatography-<br>mass spectrometry | 0.038 ppb          | -                            | 60        |
| 9.      | -do-           | GST biosensor                                           | 4 ppb              | 4-30 ppb                     | This work |
| 10.     | Dimethoate     | Acetylcholinesterase biosensor                          | 0.4 ppb            | 2.29-5.5x10 <sup>2</sup> ppb | 61        |
| 11.     | -do-           | -do-                                                    | 2.29 ppb           | 11.45-22 ppb                 | 62        |
| 12.     | -do-           | -do-                                                    | 389 ppb            |                              | 63        |
| 13.     | -do-           | GST biosensor                                           | 5 ppb              | 5-25 ppb                     | This work |
| 14.     | * Cypermethrin | Surface plasmon resonance                               | 0.5 ppb            | -                            | 64        |
| 15.     | -do-           | Nucleic acid sensor                                     | 2.5 ppb            | 2.5–2x10 <sup>3</sup> ppb    | 65        |
| 16.     | -do-           | Enzyme-linked immunosorbent assay                       | 0.5 ppb            | -                            | 66        |
| 17.     | -do-           | DNA biosensor                                           | 2.5 ppb            | -                            | 67        |
| 18.     | -do-           | *GST biosensor                                          | 2 ppb              | 2-25 ppb                     | 53        |

\*Cypermethrin was analyzed by the same method in our previous work (Reference 53)
